# Supplementary material for: GNS4, a novel allele of DWARF11, regulates grain number and grain size in a high-yield rice variety
Source: Springer Nature journal article supplement (doi:10.1186/s12284-017-0171-4), 2017-07-20
Supplement: 12284_2017_171_MOESM1_ESM.pdf [file 12284_2017_171_MOESM1_ESM.pdf]

Supplemental Table S1. Primers used in this study.

| Primers     | Forward (5'-3')                    | Reverse (5'-3')                    | Purpose                 |
|-------------|------------------------------------|------------------------------------|-------------------------|
| LYH-52      | TCTTCTCACTATTCGCTTCG               | TCGTCATCGCTTGAGGTT                 | Mapping                 |
| LYH-54      | GTTGTACGGCACGCTGAT                 | TTTATTTACAGGGTGAGATGG              | Mapping                 |
| LYH-71      | TTTGGCTAGGTTTGACGG                 | AATGGGCCTTTGATTGG                  | Mapping                 |
| LYH-73      | TTTGGCTAGGTTTGACGG                 | AATGGGCCTTTGATTGG                  | Mapping                 |
| LYH-84      | GAAGAAGTAGATAGGAGGAGGA             | AGATCAAGATCAGCCCAAG                | Mapping                 |
| LYH-91      | CGAAATCACATCTCAATCC                | TCTTGCGTTTCTGGCTAT                 | Mapping                 |
| 39430HB-Pro | aaaGAATTCTGGTGGCCATTGTAGGAGTAGGTCT | aaaGGTACCCTTACCTATAGCCTCACACCAGG   | Complementation test    |
| 39430HB-CDS | aaaGGTACCATGGTGGGAGGAGAGCTTGTGCT   | aaaGGATCCTCAGGATTCAGAGCAAAGTGGCTCG | Complementation test    |
| RNAi1       | aaaGGATCCGGTGAGACGCTGAGGTT         | aaaACTAGTCCTGAGCCTCTTGTTGGT        | RNAi analysis           |
| OX1         | aaaGGATCCATGGTGGGAGGAGAGCTTGTGCT   | aaaGGTACCTCAGGATTCAGAGCAAAGTGGCTCG | Overexpression analysis |
| Real_GNS4   | TTGCTTTGCTGCTGACC                  | TCCTGAGCCTCTTGTTGGT                | qRT-PCR                 |
| Real_Actin  | GATGACCCAGATCATGTTTG               | GGGCGATGTAGGAAAGC                  | qRT-PCR                 |
